## Emergence of a recurrent insertion in the N-terminal domain of the SARS-CoV-2 spike glycoprotein

Marco Gerdo<sup>1\*</sup>

<sup>1</sup>University of Trieste, Department of Life Sciences, Via Giorgieri 5, 34127 Trieste, Italy

Correspondence should be addressed to: [mgerdol@units.it](mailto:mgerdol@units.it)

### Abstract

Tracking the evolution of the severe acute respiratory syndrome coronavirus 2 (SARS-CoV-2) through genomic surveillance programs is undoubtedly one of the key priorities in the current pandemic situation. Although the genome of SARS-CoV-2 acquires mutations at a slower rate compared with other RNA viruses, evolutionary pressures derived from the widespread circulation of SARS-CoV-2 in the human population have progressively favored the global emergence through natural selection of several variants of concern that carry multiple non-synonymous mutations in the spike glycoprotein. Such mutations are often placed in key sites within major antibody epitopes and may therefore confer resistance to neutralizing antibodies, leading to partial immune escape, or otherwise compensate minor infectivity deficits associated with other mutations. As previously shown by other authors, several emerging variants carry recurrent deletion regions (RDRs) that display a partial overlap with antibody epitopes located in the spike N-terminal domain. Comparatively, very little attention has been directed towards spike insertion mutations, which often go unnoticed due to the use of insertion-unaware bioinformatics analysis pipelines. This manuscript describes a single recurrent insertion region (RIR1) in the N-terminal domain of SARS-CoV-2 spike protein, characterized by the independent acquisition of 2-4 additional codons between Arg214 and Asp215 in different viral lineages. Even though RIR1 is unlikely to confer antibody escape, its progressive increase in frequency and its association with two distinct emerging lineages (A.2.5 and B.1.214.2) and with known VOCs warrant further investigation concerning its effects on spike structure and viral infectivity.

### Introduction

Coronaviruses generally accumulate mutations at a much lower rate than other RNA viruses, thanks to the efficient proofreading exonuclease activity exerted by nsp14, in complex with the activator protein nsp10 [1,2]. As a result, the rate of molecular evolution of SARS-CoV-2 is currently estimated (as of May 1<sup>st</sup> 2021, based on GISAID data [3]), to be close to 24 substitutions/year per genome, i.e.  $8.25 \times 10^{-4}$  substitutions/site/year, which is very close to previous estimates for human endemic coronaviruses [4]. Consistently with comparative genomics data obtained from other members of the Sarbecovirus subgenus, such mutations are not evenly distributed across the genome, but they are disproportionately located in the S gene, which encodes the spike glycoprotein. It is also worth noting that the S gene undergoes frequent recombination events, likely as a result of naturally occurring co-infections in the animal viral reservoirs [5], and that these events are theoretically possible also among different SARS-CoV-2 lineages [6]. The encoded transmembrane protein forms a homotrimer and plays a fundamental role in the interaction between the virus and host cells, promoting viral entry through the interaction with different membrane receptors [7], which, in the case of SARS-CoV-2 and of the closely related SARS-CoV responsible of the 2002-2004 outbreak, is represented by the angiotensin converting enzyme 2 (ACE2) [8,9].

While most of these mutations have little or no phenotypic impact at all, some may significantly influence viral transmissibility and the ability of the virus to escape host immune response. The causes underpinning such phenotypic effects may either lie in an increased viral shedding, in the alteration of the binding affinity between the spike receptor binding domain (RBD) and the host ACE2 receptor, or in the modification of key

antibody epitopes. The most striking example of a non-synonymous mutations which had a dramatic impact on the dynamics of the pandemics is most certainly represented by S:D614G. This mutation, which was not present in the ancestral lineage that caused the Wuhan outbreak, emerged in the very early phases of the pandemics, quickly becoming dominant worldwide [10], most likely due to an increased packing of functional spike protein into the virion [11]. As of May 2021, D614G is associated with more than 99% of the SARS-CoV-2 genomes sequenced daily and just a very limited number of lineages lacking this mutations have been linked with recent local outbreaks (e.g. A.23.1 in Uganda) [12].

Even though the mutation rate of the SARS-CoV-2 genome remained relatively stable throughout 2020, growing evidence soon started to point out the presence of shared mutations across multiple independent lineages, suggesting ongoing convergent evolution and possible signatures of host adaptation [13]. While early investigations failed to identify evidence of increased transmissibility associated with such recurrent mutations [14], the nearly contemporary emergence, in different geographical locations and on different genetic backgrounds, of three variants sharing the non-synonymous substitution S:N501Y started to raise serious concerns about the possible involvement of this mutation in increasing viral infectivity. While the functional role of N501Y still remains to be fully elucidated, structural modeling points towards a possible function in the stabilization of the spike protein in the open conformation, which may increase ACE2 binding, especially in combination with other mutations targeting the RBD [15–17].

B.1.1.7, one of the three emerging lineages carrying N501Y, which originally spread in southeastern England, appears to be significantly more transmissible than wild-type genotypes [18], but is not associated with significant immune escape from the neutralizing activity of convalescent or vaccinated sera [19–22]. On the other hand, some point mutations present in the spike N-terminal domain (NTD), i.e. the deletion of a codon in position 144, lead to full escape from the activity of a few NTD-directed monoclonal antibodies [23].

The two other major variants of concerns (VOCs), B.1.351 and P.1 were linked with major outbreaks in geographical regions with very high estimated seroprevalence, i.e. in the Eastern Cape region (South Africa) [24] and in Manaus (Amazonas, Brazil) [25], respectively. Both variants are characterized by a constellation of non-synonymous mutations and accelerated rates of evolution, which suggests that their selection might have occurred in immunocompromised patients with persistent viral infection [26]. Among the many features shared by B.1.531 and P.1, the most remarkable one is the presence of two additional RBD mutations, i.e. E484K and K417N/K417T. The former one is now found in a number of other emerging lineages and it has been identified as a key player in antibody escape, due to its presence in a major epitope recognized by class II RBD-directed antibodies [27–29]. On the other hand, K417 is located in an epitope recognized by class I antibodies, and is thought to provide a minor contribution to polyclonal antibody response escape [27] and to possibly stabilize, together with E484K and N501Y, the interaction between the RBD and the ACE2 receptor [15]. The trends of new infections connected with these VOCs and other emerging variants of interest (VOIs) are being closely monitored due to the possible negative impact they might have on massive vaccination campaigns [30,31]. More recently, the status of two additional closely related lineages, B.1.427 and B.1.429, first described in California, was raised by the CDC from VOI to VOC [32]. Although these variants may be linked with a moderate increase in transmissibility, their spread in Northern America as of May 2021 is rapidly declining, along with the rise of B.1.1.7 in the region. The two Californian lineages are characterized by the presence of S:L452R, which is located in a major class III RBD-directed antibody epitope [31]. While this mutation allows complete escape the neutralizing activity of several monoclonal antibodies (mAbs) [33], its contribution to escape from polyclonal sera only appears to be modest [34].

Among the five aforementioned VOCs, two (B.1.1.7 and B.1.351) carry spike deletions in the NTD. Concurrently with their global spread [18,35], as well as with the emergence of large local outbreaks linked with other VOIs, such as B.1.258 [36], B.1.525 [37] and B.1.526.1 [38], the overall frequency of observation of spike deletions dramatically increased over time. Such deletions were previously shown to specifically

occur in four distinct NTD sites, named Recurrent Deletion Regions (RDR) 1, 2, 3 and 4, arising in different geographical backgrounds, in independent viral lineages. The four RDR sites strikingly display a significant overlap with known immune epitopes, suggesting that they may drive antibody escape [39].

Comparatively, very little attention has been directed towards spike insertions, even though such events are known to have played a fundamental role in the past evolution of SARS-CoV-2 spike protein, allowing, among the other things, the acquisition of a furin-like cleavage site, which is an uncommon feature in bat coronaviruses. This short motif, which is thought to be a key pathogenicity determinant [40], is indeed completely absent in the closely related sarbecovirus RaTG13 [41] and only partly present in the recently described RmYN02 [42].

This work suggests that the impact of spike insertion mutations on SARS-CoV-2 genome evolution, albeit much lower than spike deletions, has been probably so far neglected. Several distinct insertion events (i.e. at least thirteen) have indeed repeatedly occurred at the very same NTD site, located between Arg214 and Asp215, which will hereafter be referred to as Recurrent Insertion Region 1 (RIR1). While the functional implications of such insertions presently remains unclear, the international spread of the A.2.5 and B.1.214.2 lineages, which both carry a three-codon insertion at RIR1 combined with multiple other non-synonymous spike mutations, strongly suggest that more attention should be put in the near future towards the acquisition of similar insertions in known VOCs and VOIs. Moreover, several bioinformatics tools presently used for SARS-CoV-2 genome assembly and variant calling often mistakenly disregard true insertion mutations, considering them as sequencing errors, which highlight that more efforts should be put towards the development and use of insertion-aware algorithms for a more efficient monitoring of emerging SARS-CoV-2 variants.

## Materials and methods

All SARS-CoV-2 genome data used in this study were retrieved from GISAID (last access date May 1<sup>st</sup> 2021) [3]. In detail, all available sequenced genomes belonging to the lineages A.2.5 (and the related sublineages A.2.5.1 and A.2.5.2) and B.1.214.2 were downloaded, along with associated metadata. While all GISAID entries were considered for reporting observation frequencies, only high quality genomes (i.e. those listed as “complete” and “high coverage”) associated with a sampling date were taken into account for further analysis. Genomes containing long stretches of NNNs (i.e. comprising more than 25 consecutive undetermined amino acids) were discarded. Entries belonging to the sister lineages A.2.4, B.1.214, B.1.214.1, B.1.214.3 and B.1.214.4 were also retrieved and processed as mentioned above. The reference isolate Wuhan-Hu-1 was also included for tree rooting purposes. Note that several genome sequences from Panama with sampling date anterior to November 2021 were discarded due to the unreliability of associated metadata (i.e. the sampling dates appeared to be inconsistent with the very small genetic distances with recent isolates belonging to the same lineage). Overall, the A.2.5- and B.1.214.2-focused datasets included 313 and 402 sequences, respectively.

SARS-CoV-2 genomes were analyzed with the nextstrain *augur* pipeline (<https://github.com/nextstrain/augur>). Briefly, nucleotide sequences were aligned with MAFFT [43] and the resulting multiple sequence alignment was used as an input for a maximum likelihood phylogenetic inference analysis, carried out with FastTree [44] under a generalized time reversible (GTR) model of molecular evolution. The resulting tree was further refined in the *augur* environment with *treetime* v.0.8.1 [45] using sampling date metadata, generating a time-calibrated tree. Phylogenetic trees were rooted based on the oldest genotype available, which in this case was Wuhan-Hu-1, and graphically rendered using FigTree v.1.1.4.

The global frequency of insertion and deletion mutations mapped on the SARS-CoV-2 S gene was retrieved from <https://mendel.bii.a-star.edu.sg/> (last accessed on May 1<sup>st</sup>, 2021; credit to Raphael Tze Chuen Lee). Disruptive insertion and deletion mutations (i.e. those that interrupted the open reading frame of the S gene) and insertions carrying undetermined amino acids were discarded.

Root-to-tip genetic distance analyses were performed by plotting the sampling dates against the total number of nucleotide substitutions (excluding insertions and deletions) observed in A.2.5, B.1.214.2 and related lineages. These were calculated with MEGA X [46], compared with the reference genotype Wuhan-Hu-1. The global average genome-wide mutation rate of SARS-CoV-2, roughly equivalent to 24 substitutions per year, was retrieved from GISAID (as of May 1<sup>st</sup> 2021,).

The average number of non-synonymous mutations, insertions and deletions affecting the spike protein in recently sequenced genomes belonging to the A.2.5 and B.1.214.2 lineages (i.e. those with sampling date posterior to April 1<sup>st</sup> 2021) was calculated with MEGA X [46], compared with the reference genotype Wuhan-Hu-1. The same metric was similarly computed for the variants of concern B.1.1.7, B.1.351.1, B.1.427, B.1.429 and P.1, and for the variants of interest A.23.1, A.27, B.1.525, B.1.526, B.1.526.1, B.1.526.2, B.1.617.1, B.1.617.2, P.2, P.3 and R.1. The widespread European lineage B.1.177 was used as a control lineage with no evidence of increased transmissibility or immune evasion properties.

## Results and discussion

### Presence of a recurrent insertion region (RIR1) in the N-terminal domain of SARS-CoV-2 spike protein

The analysis of the genomic data deposited in GISAID as of May 1<sup>st</sup> 2021 revealed that S gene insertions (excluding those that disrupted the open reading frame) were present in just a minor fraction of all sequenced SARS-CoV-2 genomes, i.e. roughly 0.1% of the total. The impact of insertion mutations in the S gene on viral evolution has been very limited compared with deletion mutations, which are currently found in several widespread lineages, such as B.1.1.7 and B.1.351. Overall, spike deletions have been observed with a frequency approximately 800 folds higher than insertions. As previously reported by other authors, most deletions occur in specific sites of the N-terminal domain, named Recurrent Deletion Region (RDR) 1, 2, 3 and 4 (**Figure 1**) [39], which is consistent with the higher rate of mutation observed for the S1 region in human coronaviruses compared with the more slowly evolving S2 subunit [47].

Despite their lower frequency of occurrence, insertions do not occur randomly in the S gene. Here we show that the overwhelming majority of the insertion mutations mapped so far in SARS-CoV-2 target the NTD, being in most cases (i.e. ~1700 genomes) identified at a specific site, located between Arg214 and Asp215 (**Figure 1**). Due to the convergent finding of such insertions in independent viral lineages (see below), this region will be hereafter named Recurrent Insertion Region 1 (RIR1).

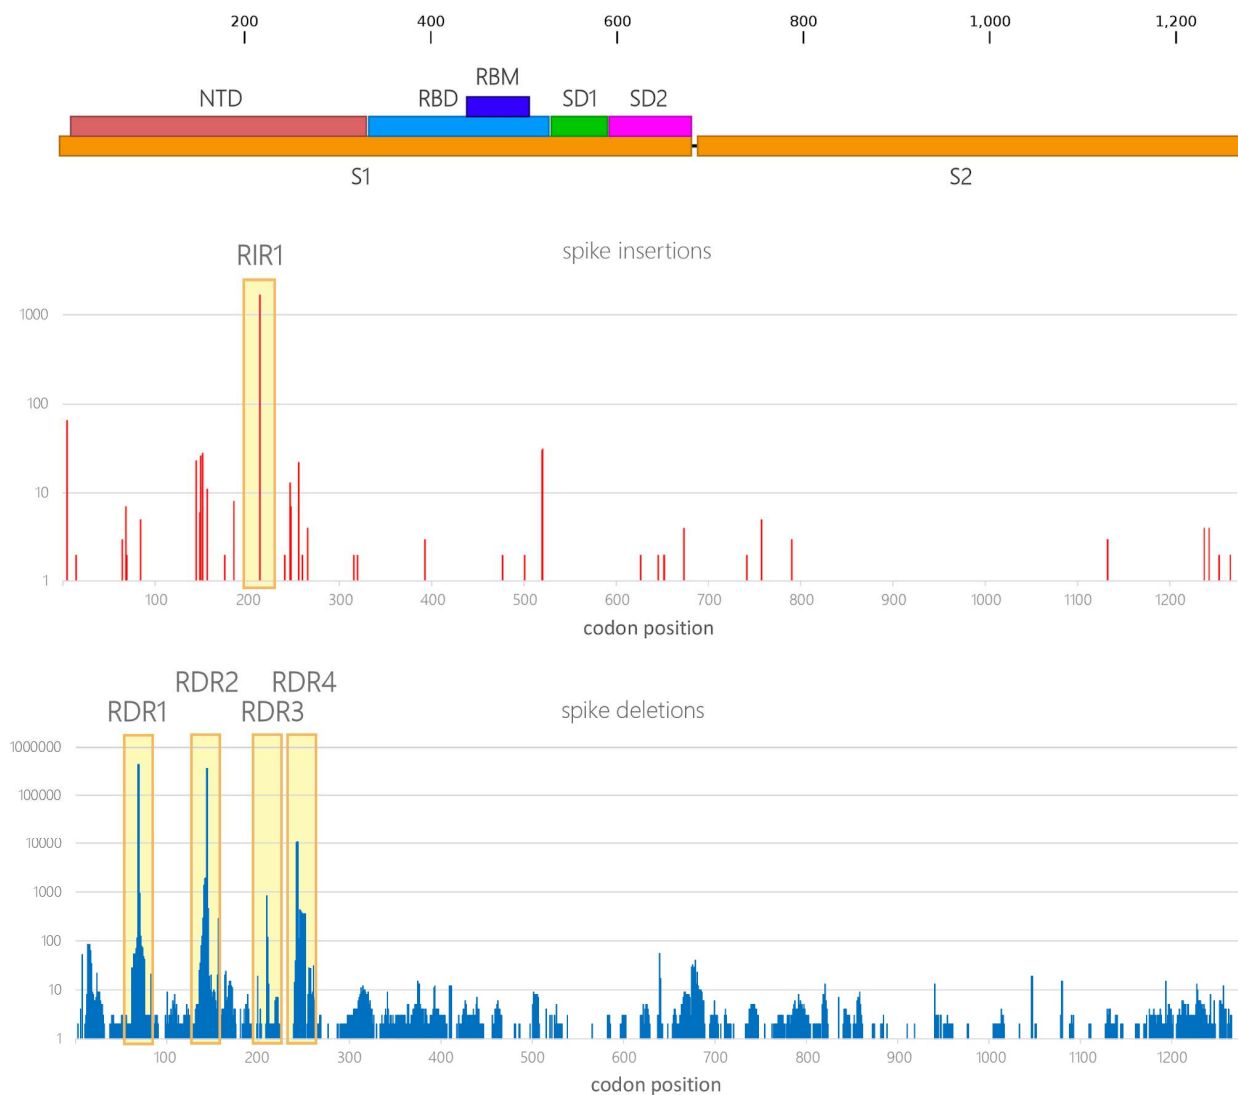

**Figure 1.** Schematic representation of the SARS-CoV-2 protein, with indication of the two functional S1 and S2 subunits, which are separated by a furin-like proteolytic cleavage site, the N-terminal domain (NTD), the receptor binding domain (RBD) and receptor binding motif (RBM), the SD1 and SD2 subdomains. The absolute number of observations of insertion and deletion mutations found along the S-gene are reported in a Log<sub>10</sub> scale (<https://mendel.bii.a-star.edu.sg/> was last accessed on May 1<sup>st</sup> 2021). The position of RDR1-RDR4 from a previous study [39], as well as the position of the newly identified RIR1 are reported.

We found that RIR1 insertions were the result of thirteen independent events that occurred in different branches of the SARS-CoV-2 global phylogenetic tree, which strongly suggests convergent evolution (**Table 1**). Even though the length of the insertion either spanned from two to six codons (**Figure 2**), the overwhelming majority of the genomes with RIR1 insertions (99.5% of the total) only included three codons (**Table 1**). Out of these, only two insertion events have led to a significant community spread, whereas in the other ten cases the small number of sequenced samples and the short timespan of detection points to isolated cases that likely did not lead to a significant number of secondary infections (**Table 1**).

While the two major types of RIR1 insertions (i.e. those characterizing the A.2.5 and B.1.214.2 lineages) will be discussed in detail below, it is worth noting that some of the other occasional events occurred in lineages that have been previously identified in VOCs. In detail, the S:ins214AQER mutation (**Figure 2**), reported in a single patient in California on January 15<sup>th</sup> 2021, occurred in a viral isolate with a B.1.429 genetic background [32]. On the other hand, S:ins214ANRN was found in four viral genomes belonging to the P.1 lineage,

sequenced in Manaus (Amazonas, Brazil) between December 2020 and January 2021. As reported in a previous work [48], the four genomes belong to a monophyletic P.1-like clade that appears to be basal to P.1, which suggests that limited transmission in the community might have been present at the time of sampling. P.1 is currently considered one of the major VOCs and its worldwide prevalence is being constantly monitored due to the combination of three key RBD mutations (K417T, E484K and N501Y), which may jeopardize the efficiency of some vaccines by promoting antibody escape [25,49].

The highly transmissible B.1.1.7 lineage, which is now dominant in Europe and quickly spreading worldwide [50], was associated with at least three independent insertions at RIR1: (i) S:ins214KFH, documented in three patients in Scotland in February 2021; (ii) S:ins214ER, identified in a single patient in Illinois in March 2021; (iii) S:ins214APR, found in a single case in Greece in late March 2021.

Curiously, one of the most recent insertion events at RIR1 occurred in an unclassified B.1 sublineage, associated with a small cluster of infections in New York and New Jersey. In this case, the S:ins214AQS insertion was paired with a high number of non-synonymous mutations in the S gene, including E484K, and by the deletions  $\Delta 69/\Delta 70$  (found in RDR1) and  $\Delta 144$  at RDR1 (found in RDR2), shared by several VOCs and VOIs, which suggest that this particular variant may be endowed with immune escape properties. Genome sampling dates, as well as the detection of this novel variant in two neighboring states, suggests the presence of early community spread.

Taking into account the limited efforts carried out by several countries in genomic surveillance, those reported in Table 1 may represent just a fraction of the SARS-CoV-2 variants carrying insertions at RIR1 that emerged during the course of the pandemic, either already extinct or currently part of ongoing undocumented community transmission.

| Insertion | Lineage   | GISAID entries | Other spike mutations                                                                   | Earliest detection | Community transmission |
|-----------|-----------|----------------|-----------------------------------------------------------------------------------------|--------------------|------------------------|
| AKKN      | B         | 1              | none                                                                                    | Mar 5th, 2020      | no                     |
| AAG       | A.2.5     | 773*           | L141del, G142del, V143del, D215Y, L452R, D614G                                          | Apr 12th, 2020     | yes                    |
| KLGP      | B.1.177   | 1              | E154K, A222V, D614G                                                                     | Nov 13th, 2020     | no                     |
| TDR       | B.1.214.2 | 902            | Q414K, N450K, D614G, T716I                                                              | Nov 22nd, 2020     | yes                    |
| ANRN      | P.1       | 4              | L18F, P26S, D138Y, K417T, E484K, N501Y, D614G, D1139H, V1176F                           | Dec 23rd, 2020     | unknown                |
| AQER      | B.1.429   | 1              | S13I, P26S, S98F, W152C, L452R, D614G, T1027I                                           | Jan 15th, 2021     | unlikely               |
| DLA       | B.1.2     | 3              | D614G                                                                                   | Jan 17th, 2021     | unlikely               |
| DRS       | B.1       | 1              | D215N, V382L, D614G, M1237I                                                             | Feb 1st, 2021      | unlikely               |
| KRI       | B         | 3              | V367F, E990A                                                                            | Feb 3rd, 2021      | unlikely               |
| KFH       | B.1.1.7   | 3              | H69del, V70del, Y144del, N501Y, A570D, D614G, P681H, T716I, S982A, D1118H               | Feb 12th, 2021     | unlikely               |
| ER        | B.1.1.7   | 1              | H69del, V70del, Y144del, D215G, N501Y, A570D, D614G, P681H, I712V, T716I, S982A, D1118H | Mar 11th, 2021     | unlikely               |
| QAS       | B.1       | 7              | H69del, V70del, Y144del, M153T, T478K, E484K, D614G, T859N, D936Y                       | Mar 13th, 2021     | unknown                |
| APR       | B.1.1.7   | 1              | H69del, V70del, Y144del, A262S, N501Y, A570D, D614G, P681H, T716I, S982A, D1118H        | Mar 31st, 2021     | unlikely               |

**Table 1.** Summary of the thirteen independent RIR1 insertions found in the SARS-CoV-2 genome, ordered by the earliest date of detection. The assessment of presence and absence of present community transmission was based on the date of the latest reported cases and on the quality of the molecular surveillance programs carried out by different countries. \*A.2.5 was also linked with two single events where the inserted sequence was modified to ASG and AAGAAG, respectively.

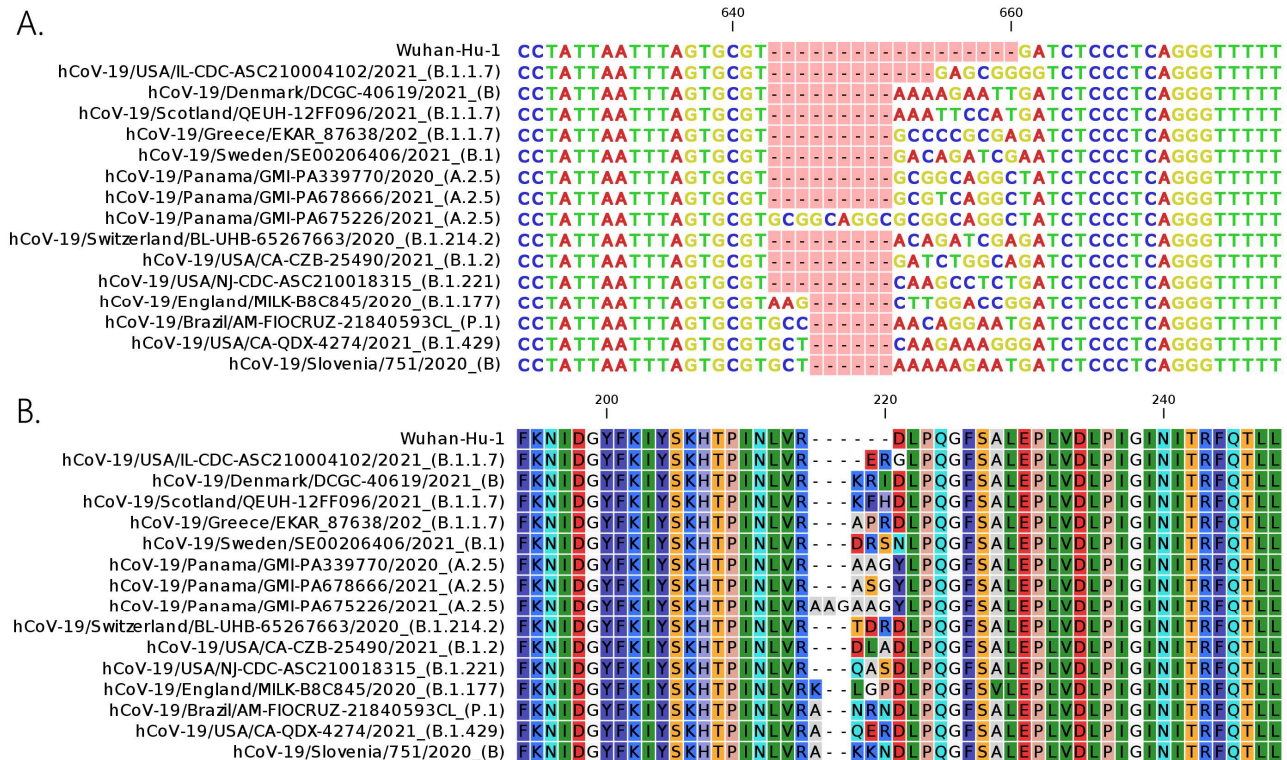

**Figure 2.** Multiple sequence alignment of the nucleotide (panel A) and translated protein (panel B) sequences of the SARS-CoV-2 S gene of the viral lineages characterized by an insertion at RIR1, compared with the reference sequence Wuhan Hu-1. The multiple sequence alignment only displays a small portion of the S gene and of the encoded spike protein, zoomed-in and centered on RIR1.

### Characterization of the lineage-defining mutations in A.2.5 and B.1.214

The only two lineages with insertions at RIR1 with solid evidence of current community transmission are A.2.5 and B.1.214.2, whose context of emergence will be discussed in detail in the following sections.

The insertion found in A.2.5 is S:ins214AAG, corresponding to the GCGGCAGGC nucleotide sequence, even though in two single cases the inserted sequence was duplicated (resulting in S:ins214AAGAAG) or contained a non-synonymous mutation (resulting in S:ins214ASG) (**Figure 2**). Remarkably, this insertion is paired with a non-synonymous substitution of Asp215 to Tyr (as a result of a GAT->TAT codon replacement). Besides the insertion at RIR1, A.2.5 also displays the deletion of three codons ( $\Delta$ 141-143) in RDR2 (**Figure 1**), sometimes extending to codon 144. This region has been previously implicated in antibody escape [39] and shows deletions in some relevant VOCs and VOIs, including B.1.1.7, B.1.525 and B.1.526.1. In particular,  $\Delta$ 144 appears to largely explain the resistance towards several NTD-directed mAbs displayed by B.1.1.7 in vitro (Wang et al., 2021). Moreover, the insertion at RIR1 is also combined with L452R, a key mutation that confers resistance towards class III RDB-directed antibodies [27], including LY-CoV555, the basis for the the formulation of the commercial mAb bamlanivimab developed by Eli Lilly (Starr et al., 2021). L452R is also found in the VOCs B.1.427 and B.1.429, which are characterized by a moderate increase in transmissibility [51], as well as in other emerging VOIs, including A.27, B.1.617.1 and B.1.617.2 [52]. Like the overwhelming majority of the variants circulating in 2021, A.2.5 also characterized by the presence of the prevalent mutations D614G. The summary of the mutations found in A.2.5 is reported in **Figure 3**.

The typical insertion found in the lineage B.1.214.2 is S:ins214TDR, which corresponds to a ACAGATCGA nucleotide sequence. This is combined with four non-synonymous mutations (**Figure 3**): besides D614G, Q414K and N450K are found in the RBD and T716I, which is shared by B.1.1.7, is found in the S2 region. As far as the two RBD mutations are concerned, Q414K is located close to K417, a key site mutated in the VOCs P.1 (K417T) and B.1.351 (K417N). While it is unclear whether this residue is also part of an epitope recognized by class I antibodies, whose neutralizing activity is escaped by the two aforementioned VOCs [23,27], computational studies have suggested that Q414K may moderately increase RBD stability [53]. On the other hand, N450 falls within a class III neutralizing antibody epitope [54], and the S:N450K mutation in particular has been previously shown to be associated with immune escape both towards a few mAbs and towards convalescent sera [55]. Moreover, both deep mutational scanning experiments and computational simulations suggest that N450K may determine a mild increase in ACE2 binding affinity [29,56]. Currently, neither of the two B.1.214.2-associated RBD mutations are associated with other widespread SARS-CoV-2 variants. It is also worth noting that B.1.214.2 displays a large deletion (10 codons) in the N-terminal region of ORF3a, which is not found in other relevant SARS-CoV-2 lineages (**Figure 3**).

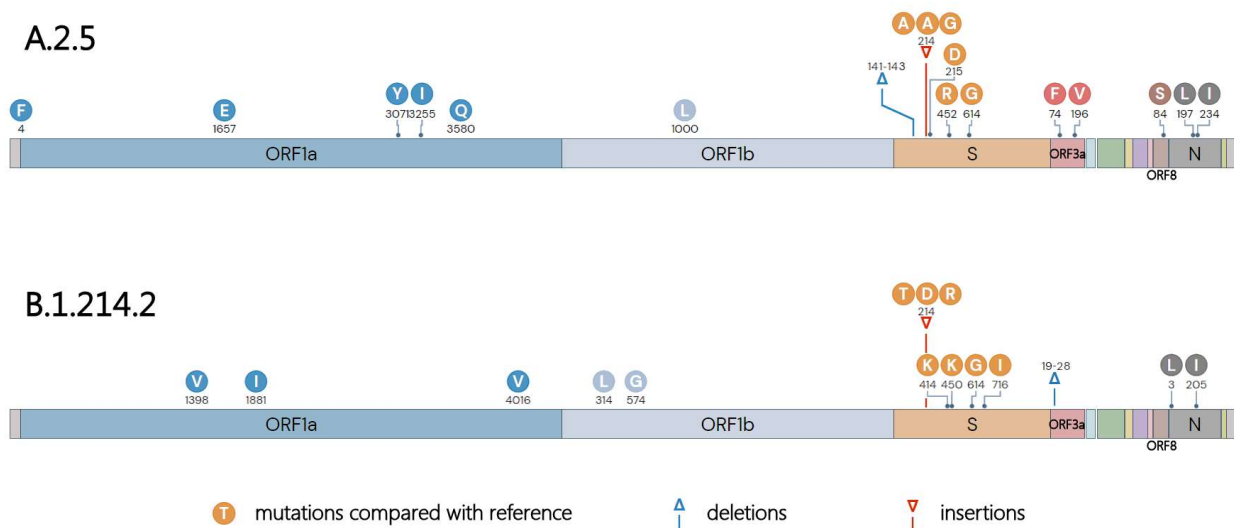

**Figure 3.** Key mutations associated with the A.2.5 and B.1.214.2 lineages. Genes associated with mutations (compared with the reference strain Wuhan-Hu-1) are indicated. Note the AAG and TDR insertions at R1R1. Modified from <https://outbreak.info/>.

### Context for the emergence of A.2.5

A.2.5 stems from A.2.4, the dominant lineage in the Panama pandemics during the first half of 2020 [57]. This lineage started spreading very early in the region, with the first detections in oropharyngeal swabs sampled in late February 2020. However, A.2.4 remained largely confined to Panama, with limited evidence of international exportation, as revealed by the fact that ~98% of the genomes belonging to this lineage deposited in GISAID are from this country. While the frequency of observation of A.2.4 significantly declined over time, this lineage likely continues to be responsible of a non-negligible fraction of covid-19 cases in Panama, according to molecular surveillance data from 2021 (8 out of 198 sequenced genomes, i.e. ~4%). The precise timing of the emergence of the A.2.5 lineage, along with the acquisition of the S:ins214AAG insertion and of the other associated mutations described in the previous section, is presently unclear due to the insufficient molecular surveillance carried out in Central America during 2020. Any inference concerning the timing of the emergence of a given lineage relies on the accuracy of the metadata associated



to each genome submission. With this respect, a few genomes belonging to the A.2.5 lineage, presumably sampled in Panama from April to August 2020, have been deposited in GISAID on April 8<sup>th</sup> 2021. Unfortunately, linear root-to-tip regression analysis (data not shown), as well as the high genetic relatedness with genotypes isolated in early 2021, strongly suggest that these samples might have been mistakenly assigned a wrong sampling date. Hence, the first reliable cases linked with A.2.5 in Panama can be traced back to late November 2020, all within a 100 km<sup>2</sup> area around the capital city Panamá. To date, less than 900 sequenced genomes out of over 350K reported covid-19 cases have been reported in this country, i.e. 0.25% of the total, far below of the threshold that would be sufficient to track emerging variants [58]. Nevertheless, A.2.5 underwent an evident expansion in Panama between December 2020 and February 2021, as revealed by the increase in estimated prevalence from ~60 to ~95%.

Not surprisingly, the remarkable spread of SARS-CoV-2 in the country (as of May 2021, the incidence of infections surpassed 80,000 cases per million inhabitants) was connected with a significant number of exported cases, which have sometimes led to clusters of infection abroad. The A.2.5 lineage likely spread very early also in the neighboring Costa Rica, where multiple introductions can be inferred from the phylogenetic tree, in spite of the limited amount of genomic information available (**Figure 4**). One of this introductions led to a major cluster of infections, providing the epidemiological event for the definition of the A.2.5.1 sublineage in the most recent PANGO release (version: 2021-04-23). While earliest investigations failed to identify A.2.5 in Costa Rica in August 2020 [59], the most recent data deposited in GISAID indicate that it may be responsible of over 45% of the covid-19 cases documented in the country between March and April 2021. While the spread of A.2.5 to other geographically close countries (e.g. Nicaragua, El Salvador and Honduras) seems likely, the lack of molecular surveillance in these regions prevents drawing definitive conclusions.

The first evidence of the detection of A.2.5 outside from Central America dates to December 1<sup>st</sup> 2020, in Ecuador. Reports in other Latin American countries remain sporadic, but it is worth noting that A.2.5 genomes have been so far sequenced in Suriname, Chile, Colombia, Mexico and Paraguay. A single imported cases has been also reported with similar timing in UAE (December 27<sup>th</sup>, 2020), and three were intercepted though border screening in Australia in January 2020. The first documented cases linked with A.2.5 in Europe were identified in Luxembourg, Portugal and Germany, but these are unlikely to have led to further community transmission. On the other hand, the significant number of cases reported in Campania in February-March 2021 (i.e. 74, accounting for 1% of the genotypes sequenced in this period in the region), strongly hints the occurrence of transmission in the community. This observation led to the definition of the A.2.5.2 sublineage in the most recent PANGO release (version: 2021-04-23), even though this monophyletic cluster includes cases from multiple countries. Similarly, imported cases have most certainly led to local cluster of infections in different areas of the United States, with evidence of multiple independent introductions both in New York (**Figure 4**) and Florida, where A.2.5 and related sublineages only represent a minor fraction (i.e. <1%) of the total number of cases recorded between February and April, 2020.

A.2.5 belongs to one of the very few surviving children lineages of the ancestral lineage A, which, after several months of limited global spread, have recently led to a few major clusters of infections. Such events, that occurred for example in Uganda (A.23.1) [12] and, most likely, also in Tanzania (A.VOI.V2) [12], are characterized by the acquisition of several spike mutations, often shared by other VOCs and VOIs.

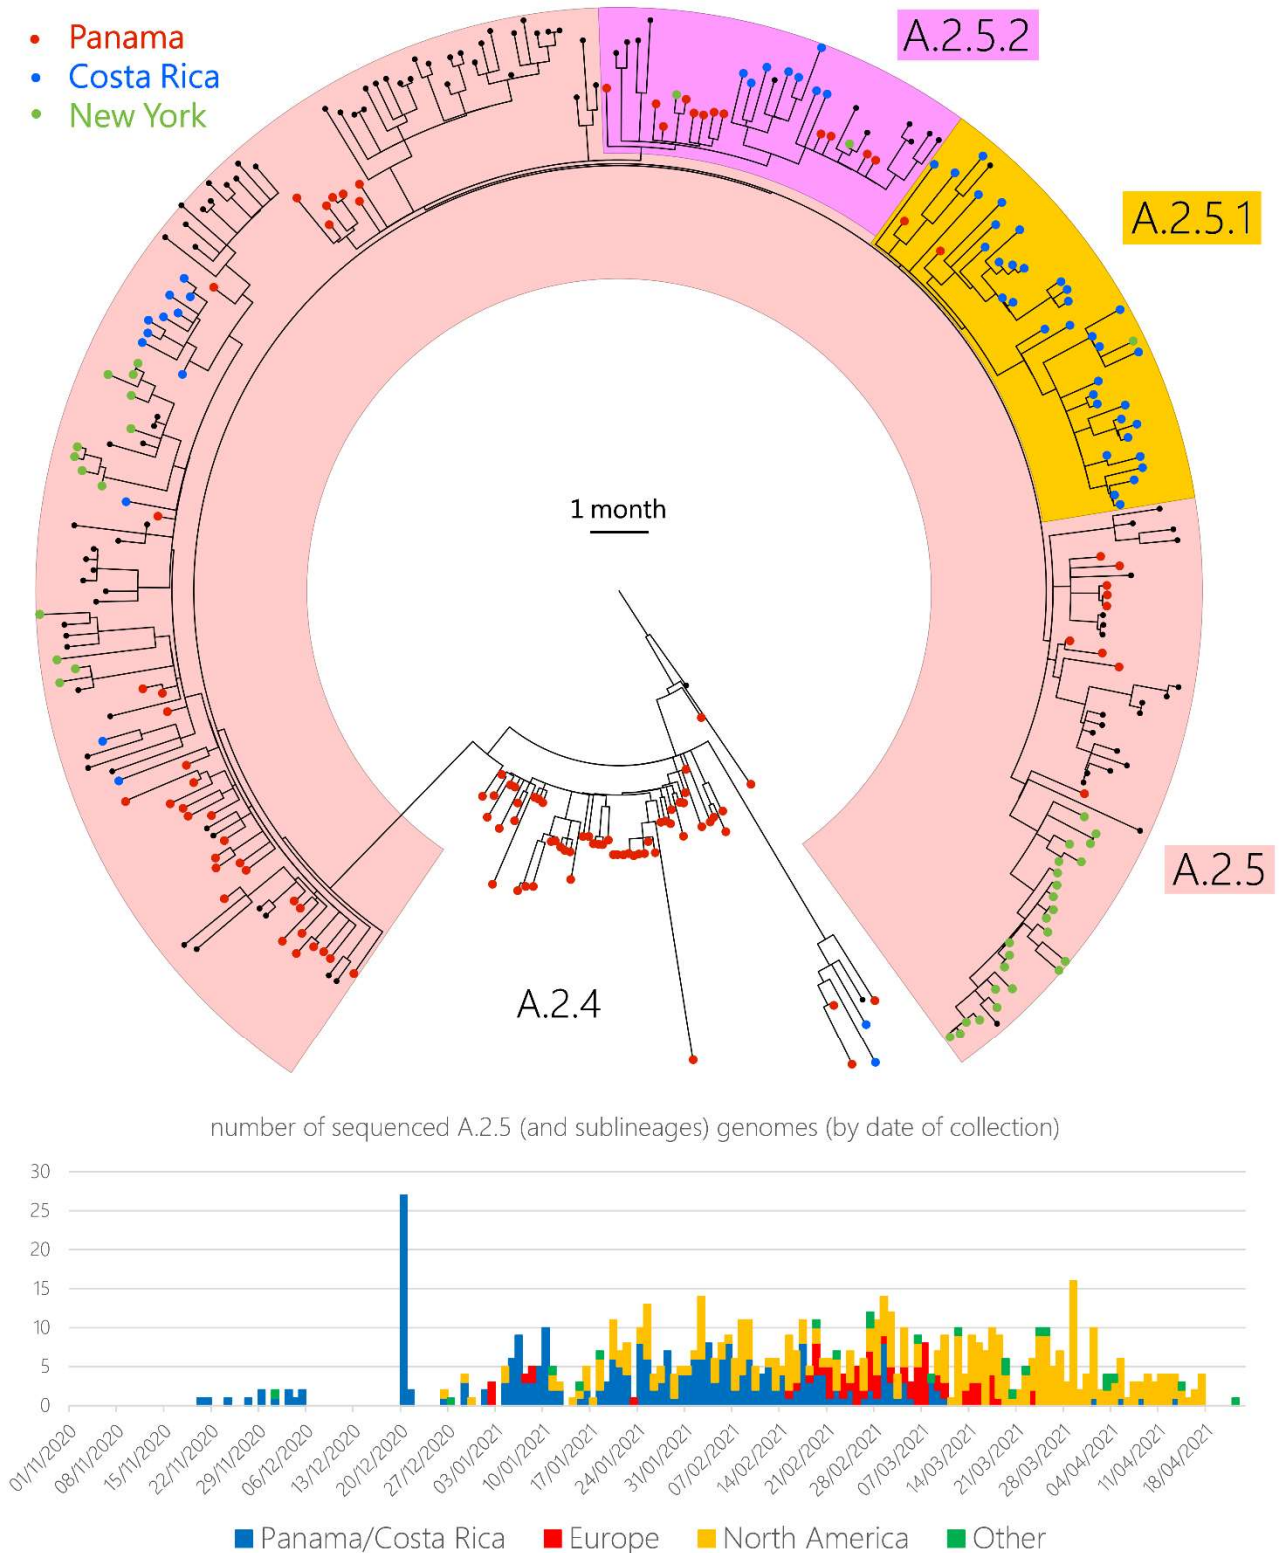

**Figure 4.** Upper panel: circular time tree exemplifying the phylogeny of the A.2.5 lineage and of its sublineages A.2.5.1 and A.2.5.2. Only high quality, complete genomes have been included. Red, blue and green tip marks indicate samples from Panama, Costa Rica and New York, respectively. The Wuhan-Hu-1 strain was used to root the tree. Lower panel: number of A.2.5 SARS-CoV-2 genomes sequenced in Panama or Costa Rica, Europe, North America and other locations, shown by date of sampling, starting from

November 1<sup>st</sup> 2020, shown by sampling date. Note that the numbers referred to recent dates are unreliable due to delays in data submission.

### **Context for the emergence of B.1.214.2**

B.1.214.2 is linked with the parent lineage B.1.214, which spread in the early phases of the pandemics in the Democratic Republic of Congo [60] and possibly in other neighboring countries where limited genomic surveillance had been carried out in the first half of 2020. As a result of exportations, four distinct sister clades later spread, with different success, in Europe between December 2020 and the first months of 2021: B.1.214.1 led to a few cases in France. The few dozen genomes belonging to the B.1.214.3 lineage have been sequenced in England, France, Belgium, Luxembourg, Germany, Portugal, Switzerland, Spain, Angola and Mayotte. With the exception of a few cases in Portugal, B.1.214.4 spread in Denmark, where its frequency quickly declined when B.1.1.7 became dominant.

Out of the four sister lineages, B.1.214.2 is, by far, the most widespread in Europe as of May 2021 (**Figure 5**). The very first cases of B.1.214.2 in the continent were detected in late November 2020 in Switzerland, and more specifically in the Basel-Landschaft. This introduction led to continued community transmission, as evidenced by the large monophyletic cluster of genotypes visible in the phylogenetic tree (**Figure 5**). The circulation of this variant continued to be significant in the Basel region in early 2021 (e.g. its estimated frequency reached 8.5% in March 2021) and subsequently dropped to lower levels, in parallel with the rapid spread of B.1.1.7. However, B.1.214.2 found its most significant spread in Belgium where, following the first detection by molecular surveillance dated January 3<sup>rd</sup> 2021 in Liège, it underwent a rapid increase in frequency, accounting for 5-6% of all the genomes sequenced between week 7 and week 9. This transient spread was followed by a moderate decline to 2-3% in the following weeks, which appears to be concomitant with the rise of B.1.1.7 (which, as of May 1<sup>st</sup> 2021 accounts for nearly 85% of all analyzed PCR-positive collected swabs). Phylogeny clearly indicates that the B.1.214.2 infections recorded in Belgium were linked with a higher genomic heterogeneity compared with Switzerland. Indeed, while most of the cases were part of a monophyletic clade (which also included several cases from abroad, likely exported), others were part of a distinct mixed Belgium/France cluster (**Figure 5**).

The precise geographical origins of B.1.214.2 can be only speculated, and it is not possible to establish with certainty whether its early spread in some European countries was linked with an endogenous origin, or with importation from an unknown country where the variant might have been not detected due to insufficient surveillance. This hypothesis seems to be supported by the report of two genomes, sequenced in Congo in late February 2021, which display the S:ins214TDR insertion, but critically lack the two key RBD mutations Q414K and N450K. While these genomes were not included in the phylogenetic analysis due to their low quality, their presence in Congo along with other “canonical” genotypes (i.e. including the insertion at R191) belonging to the B.1.214.2 lineage suggest that these may belong to a surviving ancestral sublineage, which might have served as the genetic background for the two aforementioned RBD mutations.

The major European clusters of community transmission clearly led to the exportation of cases abroad, either in neighboring regions (such as Rhineland-Palatinate in Germany or the Netherlands), or elsewhere. As of May 1<sup>st</sup> 2021, B.1.214.2 have been reported in France, Germany, Netherlands, Ireland, Portugal and United Kingdom. Based on these observations, this lineage has been recently identified as a variant under monitoring by both Public Health England [61] and ECDC (<https://www.ecdc.europa.eu/en/covid-19/variants-concern>). While both the cumulative number of known cases and the incidence of this viral lineages are still low, the genetic relatedness among the isolates from France (**Figure 5**) strongly suggest the presence of community transmission.

Evidence of spread of this variant in other continents has been limited to date. In addition to the previously mentioned cases reported in Congo, some cases have been reported in other African countries (Togo and

Senegal), in Asia (one in the Philippines on January 3<sup>rd</sup> 2021, one in India on February 21<sup>st</sup> and five in Indonesia, starting February 25<sup>th</sup> 2021). Several B.1.215.2 genomes have been recently sequenced across the United States, mostly in Maryland and Virginia, indicating multiple introductions and possible early signs of ongoing community transmission.

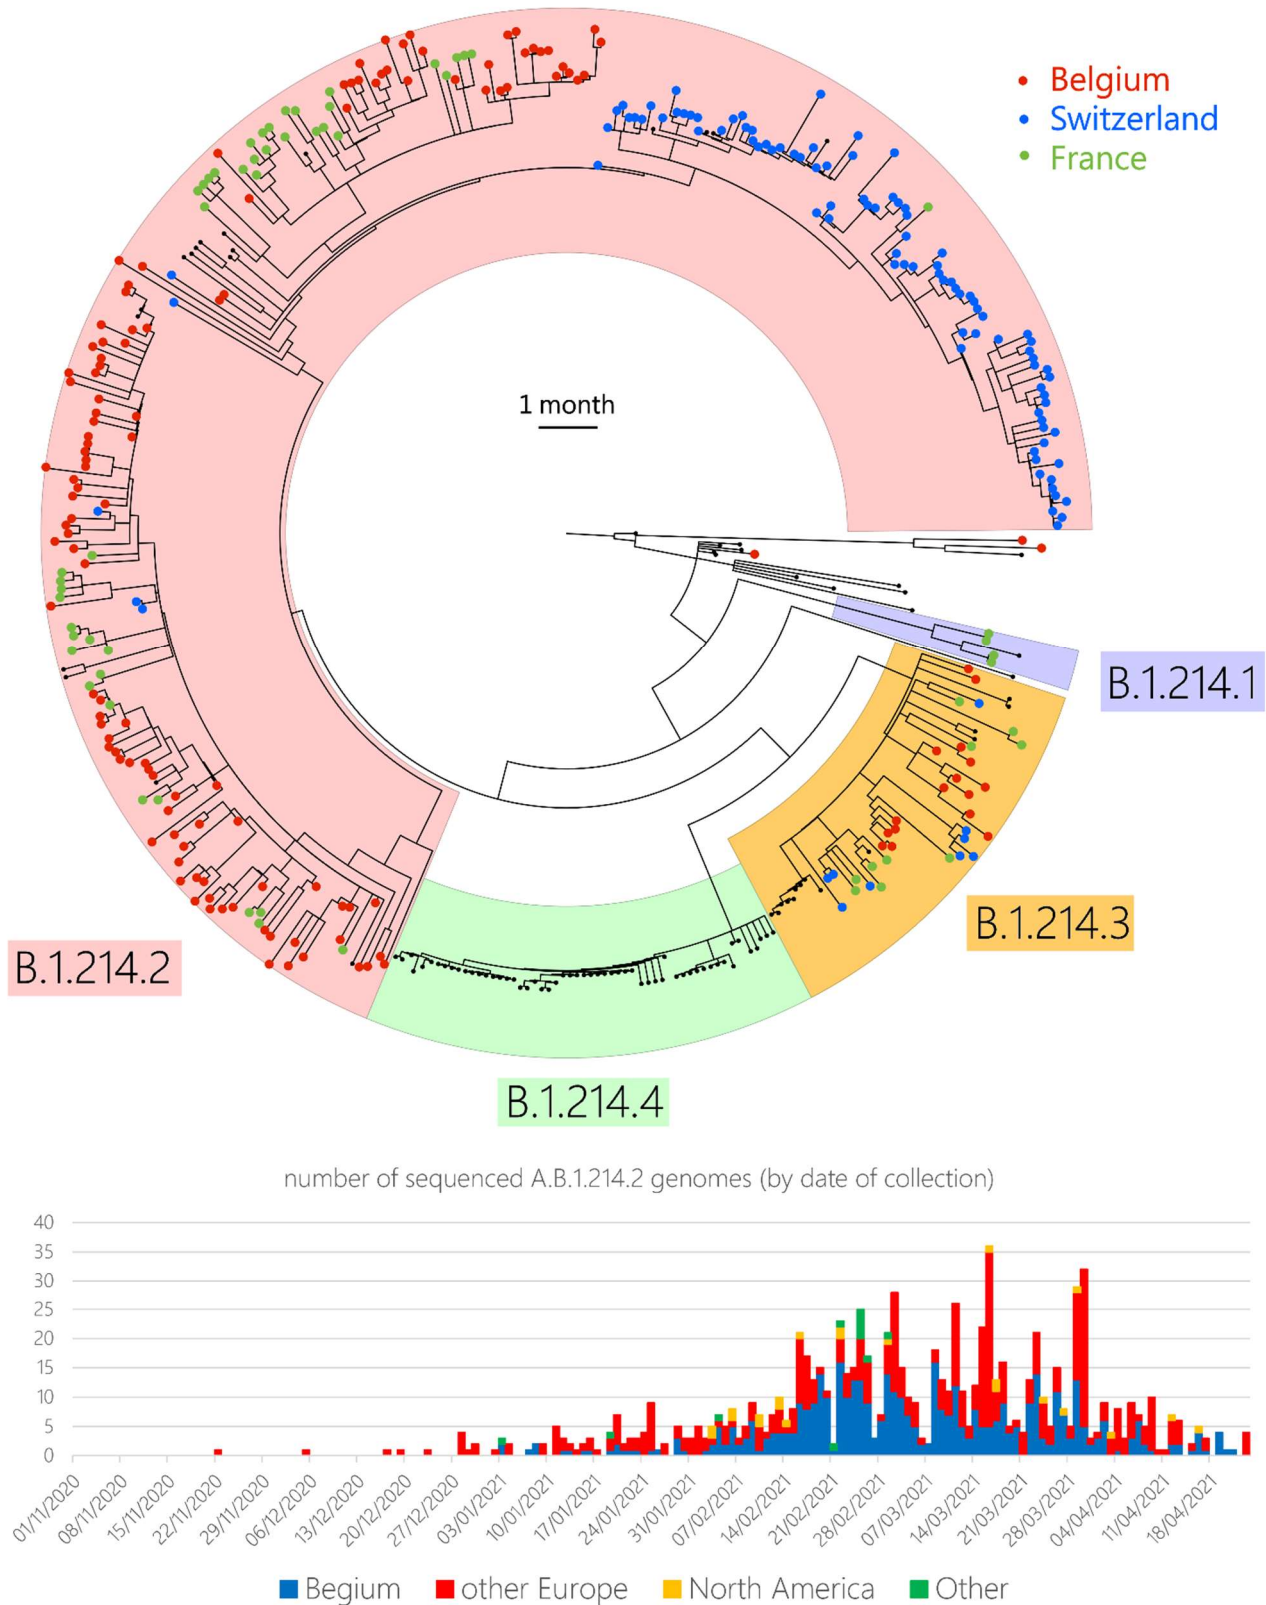

**Figure 5.** Upper panel: circular time tree exemplifying the phylogeny of the B.1.214.2 lineage, of the parental lineage B.1.214, and of the sister lineages B.1.214.1, B.1.214.3 and B.1.214.4. Only high quality, complete

genomes have been included. Red, blue and green tip marks indicate samples from Belgium, Switzerland and France, respectively. The Wuhan-Hu-1 strain was used to root the tree. Lower panel: number of B.1.214.2 SARS-CoV-2 genomes sequenced in Belgium, other European countries, North America and other locations, shown by date of sampling, starting from November 1<sup>st</sup> 2020. Note that the numbers referred to recent dates are unreliable due to delays in data submission.

### Further evolutionary considerations

RDR1 is located in a loop which connects the spike NTD  $\beta$  strands 15 and 16, a region which, unlike RDR1, 2, 3 and 4, does not show any overlap with any known major NTD antigenic sites (Cerutti et al., 2021; McCallum et al., 2021). Hence, the involvement of the insertions reported in this manuscript in antibody escape is unlikely, even though the possibility that this modification may lead to paired structural alterations at distantly related sites, leading to a reduced surface accessibility of canonical antibody epitopes cannot be ruled out. Interestingly, previous comparative genomics investigations carried out in the Sarbecovirus subgenus revealed that the spike protein of RmYN02, the closest known relative to SARS-CoV-2 [42], comprises an insertion of four codons at RIR1 in comparison with other closely related viruses. This observation points out that RIR1 has been previously prone to structural alterations during the radiation of bat coronaviruses [64]. Most certainly, the spread of the A.2.5 and B.1.214.2 lineages in different geographical contexts suggests that RIR1 insertions are unlikely to have a detrimental impact on the three-dimensional structure of the spike protein or to dramatically reduce the infectivity of these variants. At the same time, the well-defined length of the insertions (in the overwhelming majority of cases 3 or 4 codons) suggests that some critical structural constraints, that may prevent the selection of shorter insertions or limit their associated evolutionary benefits, might exist.

Detailed structural modeling studies should be carried out to predict which consequences, if any, RIR1 insertions have on the structural organization of the spike protein, on the stability of the interaction between the RBD and the ACE2 receptor, on the accessibility of distant sites to antibody recognition and on the efficiency of the proteolytic cleavage. For instance, the NTD  $\Delta 69/\Delta 70$  deletion, which, like RIR1, is found in multiple independent lineages, does not determine a significant antibody escape *in vitro* [23]. However, it is thought to have an important impact on the structure of the spike protein, by conferring increased cleavage at the S1/S2 site, thereby allowing higher incorporation in the virion (Kemp et al., 2021). In light of these observations, some NTD indels apparently not related with immune escape may act as permissive mutations, by compensating small infectivity deficits associated with other RBD mutations (i.e. L452R in A.2.5 and Q414K and N450K in B.1.214.2). The emergence of RIR1 insertions in multiple independent lineages is most certainly suggestive of convergent evolution, and their recent occurrence in some VOCs (B.1.1.7, B.1.429 and P.1) indicates that the observation of similar insertions are expected in other emerging VOIs the next few months. Root-to-tip genetic distance regression analyses indicate that A.2.5 (and sublineages A.2.5.1 and A.2.5.2) accumulated a number of nucleotide substitutions slightly higher than the majority of the other circulating SARS-CoV-2 strains, as well as of the sister lineage A.2.4. This was clearly evidenced by the deviation from average rate of genome-wide molecular evolution, estimated to be  $8.25 \times 10^{-4}$  substitutions/site/year (based on GISAID data, data retrieved on May 1<sup>st</sup> 2021). Unfortunately, the lack of genomic data from the second half of 2020 currently prevents to estimate whether this occurred in a progressive manner or abruptly, as previously evidenced for B.1.1.7 and P.1 [25] (**Figure 6A**). On the other hand, the overall rate of genomic evolution of B.1.214.2 was in line with the global evolutionary trends of SARS-CoV-2, and not significantly different from the sister lineages B.1.214.1, B.1.214.3 and B.1.214.4 (**Figure 6B**).

Nevertheless, both lineages have disproportionately accumulated a relatively large number of non-synonymous mutations in the S gene, which include, besides the insertions at RIR1, also a four-codon deletion in the case of A.2.5 (**Figure 3**). As a matter of fact, compared with the reference Wuhan Hu-1 genotype, both

major RIR1 variants display a total number of substituted, deleted or inserted amino acids in the spike protein which is in line and often superior to that of several other VOCs and VOIs. In detail, the average number of substitutions/insertions/deletions calculated for A.2.5 and related sublineages (i.e. 9.08, **Figure 6**, detailed in **Table 1**) is only second to the VOCs B.1.1.7, B.1.351 and P.1, and of the emerging lineages B.1.617.2 and P.3. Curiously, this rate of molecular evolution appears to be much higher than the VOCs B.1.427 and B.1.429 [51], and also higher than other recently described emerging lineage A variants, such as A.23.1 and A.27 [12]. The average total number of substitutions/insertions/deletions found in B.1.214.2, albeit slightly inferior to A.2.5 (i.e. 7.08, see **Table 1**), was still relatively high, in line with most other emerging VOIs and higher than other widespread lineages which are not linked with increased transmissibility or immune evasion properties (exemplified by B.1.177 in **Figure 6**).

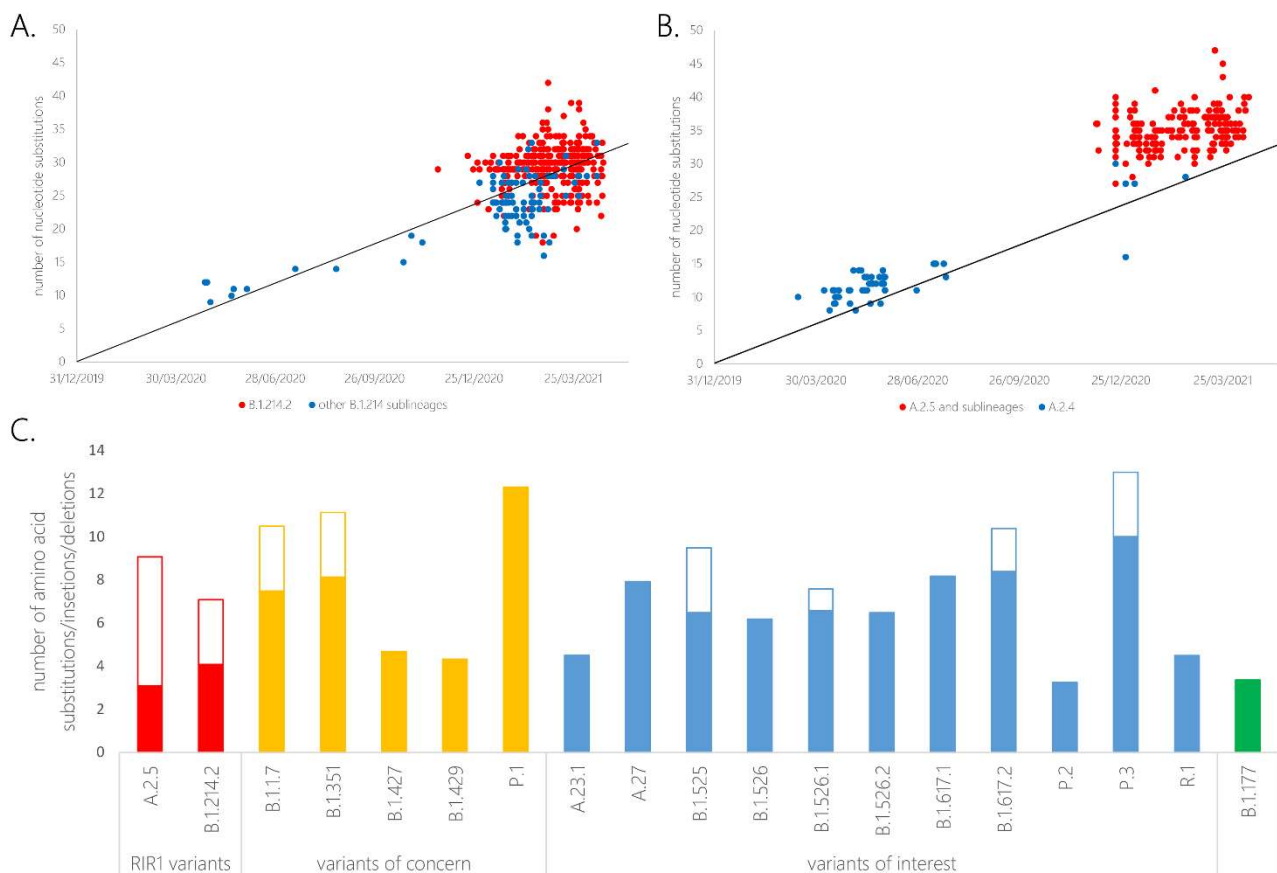

**Figure 6.** Panels A and B: root-to-tip genetic distance (number of nucleotide substitutions) of the genomes belonging to the A.2.5 and B.1.214.2 lineages, respectively, compared with parent and sister lineages. The black line represents the average rate of mutation of all SARS-CoV-2 sequenced genomes, according to GISAID (i.e. 24 substitutions per genome per year, as of May 1st 2021). Note that insertions and deletions were excluded from this calculation. Panel C: average number of amino acid substitutions (full bars), insertions and deletions (empty bars) observed in the spike protein of the two major variants with insertions at RIR1, the five VOCs and a number of VOIs. The lineage B.1.177 has been included as a non-VOC/VOI reference.

#### Technical issues in the detection of insertions in SARS-CoV-2 genomes

Several different bioinformatics tools are routinely used for variant calling and SARS-CoV-2 genome assembly. The mostly depend on the sequencing method used and with the preference of different research groups with consolidated pipelines of analysis, whose performance is usually reliable over a broad range of

sequencing outputs. However, most of these methods are based on the mapping of sequencing reads to a reference genome, and rely on the analysis of mapping files for variant calling [66]. The management of gaps (i.e. insertions and deletions) may vary from algorithm to algorithm, and the management of insertions, in particular may be problematic, leading to laboratory-specific biases. As a matter of fact, the raw sequencing reads generated with the Oxford Nanopore technology (i.e. MinION, GridION or PromethION platforms) are expected to present a relatively high error rate, in particular for what concerns the presence of artificial indels in homopolymeric sequence stretches. Usually, the presence of such sequencing errors can be overcome thanks to the high sequencing coverage obtained, that allows a consensus-based variant calling [67]. Hence, some of the algorithms specifically designed and used to carry out such tasks are not insertion-aware, i.e. they explicitly disregard any insertion detected in the alignment between the reads and the reference genome as a probable sequencing error.

This issue was particularly evident for both A.2.5 (and sublineages) and B.1.214.2, since of relevant number of GISAID entries lacked the expected lineage-defining insertions at RIR1, despite the shared ancestry of all genotypes (**Figures 4 and 5**). In detail, as of May 1<sup>st</sup> 2021, only 63% of the A.2.5 genomes carry S:ins214AAG, and only 76% of the B.1.214.2 genomes carry S:ins214TDR. These fraction of deposited genomes lacking insertions at RIR1 remains very high even if we only take into account complete, high quality genomes (i.e. 15% and 34% for A.2.5 and B.1.214.2, respectively), indicating that these artefacts are not linked with low sequencing coverage. As a striking example, just 41 out of the 193 B.214.2 genomes sequenced in Switzerland correctly report the insertion at RIR1. These entries have been submitted to GISAID by the university hospitals of Basel and Geneva, which most likely use in their routine genome analyses insertion-aware tools. On the other hand, all the B.214.2 genomes sequenced in Switzerland that lack the insertion were deposited by the same institution, i.e. ETH Zürich, which uses V-pipe [68], a tool that in its current configuration for SARS-CoV-2 variant calling disregards the possibility of insertions compared with the reference genome sequence.

Clearly, similar issues may affect other SARS-CoV-2 lineages carrying insertion mutations. For example lineage AT.1, a variant carrying an unusual insertion of four codons, close to the polybasic furin-like cleavage site (position 679), has been recently reported in Russia, and it is presently considered as a variant under monitoring by the ECDC (<https://www.ecdc.europa.eu/en/covid-19/variants-concern>), due to the contemporary presence of E484K.

Hence, taking into consideration the intercontinental spread of A.2.5 and B.1.214.2, as well as the insertions occurring at RIR1 here documented in other relevant widespread viral lineages, the use of insertion-aware genome analysis pipelines should be encouraged to allow an improved monitoring of novel insertion mutants that may otherwise go unnoticed. Similarly, existing tools that currently do not include insertion-aware variant calling, should be implemented by the developers to allow the discrimination between *bona fide* insertions and those linked with sequencing errors. While insertions have so far just occurred in a very limited subset of circulating genotypes, they may be linked with phenotypic alterations, both in terms of increase immune escape or virulence, as previously demonstrated for deletions [23,65]. In conclusion, it is the opinion of the author that more attention should be directed towards a close monitoring of the emergence of these still rare but puzzling mutations, especially whenever they are associated with lineages that have already been previously identified as VOCs or VOIs.

## Acknowledgements

The author is grateful to Prof. Alejandro Giorgetti, Dr. Klevia Dishnica, Dr. Alberto Beretta, Dr. Sarah Ann Nadeau and Dr. Alexander Martinez for their communication and useful suggestions, and the staff of Pop Medicine (<https://www.facebook.com/medicipop/>) for the support. The author also acknowledges all the fundamental work carried out by the clinicians, researchers and public health authorities that allowed the collection of SARS-CoV-2 genome data and made sequence data available in a timely manner through GISAID [3], as well as the great efforts made by the developers of nextstrain to assist researchers in SARS-CoV-2 evolution studies.

## Competing Interest Statement

The author declares he has no competing interests.

## Funding Statement

The author received no funding for this work.

## References

1. Denison, M.R.; Graham, R.L.; Donaldson, E.F.; Eckerle, L.D.; Baric, R.S. Coronaviruses: An RNA Proofreading Machine Regulates Replication Fidelity and Diversity. *RNA Biol.* **2011**, *8*, 270–279, doi:10.4161/rna.8.2.15013.
2. Ma, Y.; Wu, L.; Shaw, N.; Gao, Y.; Wang, J.; Sun, Y.; Lou, Z.; Yan, L.; Zhang, R.; Rao, Z. Structural Basis and Functional Analysis of the SARS Coronavirus Nsp14–Nsp10 Complex. *Proc. Natl. Acad. Sci.* **2015**, *112*, 9436–9441, doi:10.1073/pnas.1508686112.
3. Shu, Y.; McCauley, J. GISAID: Global Initiative on Sharing All Influenza Data – from Vision to Reality. *Eurosurveillance* **2017**, *22*, doi:10.2807/1560-7917.ES.2017.22.13.30494.
4. Ren, L.; Zhang, Y.; Li, J.; Xiao, Y.; Zhang, J.; Wang, Y.; Chen, L.; Paranhos-Baccalà, G.; Wang, J. Genetic Drift of Human Coronavirus OC43 Spike Gene during Adaptive Evolution. *Sci. Rep.* **2015**, *5*, doi:10.1038/srep11451.
5. Boni, M.F.; Lemey, P.; Jiang, X.; Lam, T.T.-Y.; Perry, B.W.; Castoe, T.A.; Rambaut, A.; Robertson, D.L. Evolutionary Origins of the SARS-CoV-2 Sarbecovirus Lineage Responsible for the COVID-19 Pandemic. *Nat. Microbiol.* **2020**, *5*, 1408–1417, doi:10.1038/s41564-020-0771-4.
6. Ignatieva, A.; Hein, J.; Jenkins, P.A. Evidence of Ongoing Recombination in SARS-CoV-2 through Genealogical Reconstruction. *bioRxiv* **2021**, 2021.01.21.427579, doi:10.1101/2021.01.21.427579.
7. Millet, J.K.; Jaimes, J.A.; Whittaker, G.R. Molecular Diversity of Coronavirus Host Cell Entry Receptors. *FEMS Microbiol. Rev.* **2020**, doi:10.1093/femsre/fuaa057.
8. Walls, A.C.; Park, Y.-J.; Tortorici, M.A.; Wall, A.; McGuire, A.T.; Velesler, D. Structure, Function, and Antigenicity of the SARS-CoV-2 Spike Glycoprotein. *Cell* **2020**, *181*, 281-292.e6, doi:10.1016/j.cell.2020.02.058.
9. Ren, W.; Qu, X.; Li, W.; Han, Z.; Yu, M.; Zhou, P.; Zhang, S.-Y.; Wang, L.-F.; Deng, H.; Shi, Z. Difference in Receptor Usage between Severe Acute Respiratory Syndrome (SARS) Coronavirus and SARS-Like Coronavirus of Bat Origin. *J. Virol.* **2008**, *82*, 1899–1907, doi:10.1128/JVI.01085-07.
10. Korber, B.; Fischer, W.M.; Gnanakaran, S.; Yoon, H.; Theiler, J.; Abfalterer, W.; Hengartner, N.; Giorgi, E.E.; Bhattacharya, T.; Foley, B.; et al. Tracking Changes in SARS-CoV-2 Spike: Evidence That D614G Increases Infectivity of the COVID-19 Virus. *Cell* **2020**, *182*, 812-827.e19, doi:10.1016/j.cell.2020.06.043.



11. Zhang, L.; Jackson, C.B.; Mou, H.; Ojha, A.; Peng, H.; Quinlan, B.D.; Rangarajan, E.S.; Pan, A.; Vanderheiden, A.; Suthar, M.S.; et al. SARS-CoV-2 Spike-Protein D614G Mutation Increases Virion Spike Density and Infectivity. *Nat. Commun.* **2020**, *11*, 6013, doi:10.1038/s41467-020-19808-4.
12. Bugembe, D.L.; Phan, M.V.T.; Ssewanyana, I.; Semanda, P.; Nansumba, H.; Dhaala, B.; Nabadda, S.; O'Toole, Á.N.; Rambaut, A.; Kaleebu, P.; et al. A SARS-CoV-2 Lineage A Variant (A.23.1) with Altered Spike Has Emerged and Is Dominating the Current Uganda Epidemic. *medRxiv* **2021**, 2021.02.08.21251393, doi:10.1101/2021.02.08.21251393.
13. van Dorp, L.; Acman, M.; Richard, D.; Shaw, L.P.; Ford, C.E.; Ormond, L.; Owen, C.J.; Pang, J.; Tan, C.C.S.; Boshier, F.A.T.; et al. Emergence of Genomic Diversity and Recurrent Mutations in SARS-CoV-2. *Infect. Genet. Evol.* **2020**, *83*, 104351, doi:10.1016/j.meegid.2020.104351.
14. van Dorp, L.; Richard, D.; Tan, C.C.S.; Shaw, L.P.; Acman, M.; Balloux, F. No Evidence for Increased Transmissibility from Recurrent Mutations in SARS-CoV-2. *Nat. Commun.* **2020**, *11*, 1–8, doi:10.1038/s41467-020-19818-2.
15. Nelson, G.; Buzko, O.; Spilman, P.; Niazi, K.; Rabizadeh, S.; Soon-Shiong, P. Molecular Dynamic Simulation Reveals E484K Mutation Enhances Spike RBD-ACE2 Affinity and the Combination of E484K, K417N and N501Y Mutations (501Y.V2 Variant) Induces Conformational Change Greater than N501Y Mutant Alone, Potentially Resulting in an Escape Mutant. *bioRxiv* **2021**, 2021.01.13.426558, doi:10.1101/2021.01.13.426558.
16. Teruel, N.; Mailhot, O.; Najmanovich, R.J. Modelling Conformational State Dynamics and Its Role on Infection for SARS-CoV-2 Spike Protein Variants. *bioRxiv* **2020**, 2020.12.16.423118, doi:10.1101/2020.12.16.423118.
17. Zhu, X.; Mannar, D.; Srivastava, S.S.; Berezuk, A.M.; Demers, J.-P.; Saville, J.W.; Leopold, K.; Li, W.; Dimitrov, D.S.; Tuttle, K.S.; et al. Cryo-Electron Microscopy Structures of the N501Y SARS-CoV-2 Spike Protein in Complex with ACE2 and 2 Potent Neutralizing Antibodies. *PLOS Biol.* **2021**, *19*, e3001237, doi:10.1371/journal.pbio.3001237.
18. Davies, N.G.; Abbott, S.; Barnard, R.C.; Jarvis, C.I.; Kucharski, A.J.; Munday, J.D.; Pearson, C.A.B.; Russell, T.W.; Tully, D.C.; Washburne, A.D.; et al. Estimated Transmissibility and Impact of SARS-CoV-2 Lineage B.1.1.7 in England. *Science* **2021**, doi:10.1126/science.abg3055.
19. Lustig, Y.; Nemet, I.; Kliker, L.; Zuckerman, N.; Yishai, R.; Alroy-Preis, S.; Mendelson, E.; Mandelboim, M. Neutralizing Response against Variants after SARS-CoV-2 Infection and One Dose of BNT162b2. *N. Engl. J. Med.* **2021**, *0*, null, doi:10.1056/NEJMc2104036.
20. Wang, G.-L.; Wang, Z.-Y.; Duan, L.-J.; Meng, Q.-C.; Jiang, M.-D.; Cao, J.; Yao, L.; Zhu, K.-L.; Cao, W.-C.; Ma, M.-J. Susceptibility of Circulating SARS-CoV-2 Variants to Neutralization. *N. Engl. J. Med.* **2021**, *0*, null, doi:10.1056/NEJMc2103022.
21. Wang, Z.; Schmidt, F.; Weisblum, Y.; Muecksch, F.; Barnes, C.O.; Finkin, S.; Schaefer-Babajew, D.; Cipolla, M.; Gaebler, C.; Lieberman, J.A.; et al. mRNA Vaccine-Elicited Antibodies to SARS-CoV-2 and Circulating Variants. *bioRxiv* **2021**, 2021.01.15.426911, doi:10.1101/2021.01.15.426911.
22. Xie, X.; Zou, J.; Fontes-Garfias, C.R.; Xia, H.; Swanson, K.A.; Cutler, M.; Cooper, D.; Menachery, V.D.; Weaver, S.; Dormitzer, P.R.; et al. Neutralization of N501Y Mutant SARS-CoV-2 by BNT162b2 Vaccine-Elicited Sera. *bioRxiv* **2021**, 2021.01.07.425740, doi:10.1101/2021.01.07.425740.
23. Wang, P.; Nair, M.S.; Liu, L.; Iketani, S.; Luo, Y.; Guo, Y.; Wang, M.; Yu, J.; Zhang, B.; Kwong, P.D.; et al. Antibody Resistance of SARS-CoV-2 Variants B.1.351 and B.1.1.7. *Nature* **2021**, 1–6, doi:10.1038/s41586-021-03398-2.
24. Sykes, W.; Mhlanga, L.; Swanevelder, R.; Glatt, T.N.; Grebe, E.; Coleman, C.; Pieterse, N.; Cable, R.; Welte, A.; Berg, K. van den; et al. *Prevalence of Anti-SARS-CoV-2 Antibodies among Blood Donors in Northern Cape, KwaZulu-Natal, Eastern Cape, and Free State Provinces of South Africa in January 2021*; In Review, 2021;
25. Sabino, E.C.; Buss, L.F.; Carvalho, M.P.S.; Prete, C.A.; Crispim, M.A.E.; Fraiji, N.A.; Pereira, R.H.M.; Parag, K.V.; Peixoto, P. da S.; Kraemer, M.U.G.; et al. Resurgence of COVID-19 in Manaus, Brazil, despite High Seroprevalence. *The Lancet* **2021**, *397*, 452–455, doi:10.1016/S0140-6736(21)00183-5.
26. Choi, B.; Choudhary, M.C.; Regan, J.; Sparks, J.A.; Padera, R.F.; Qiu, X.; Solomon, I.H.; Kuo, H.-H.; Boucay, J.; Bowman, K.; et al. Persistence and Evolution of SARS-CoV-2 in an Immunocompromised Host. *N. Engl. J. Med.* **2020**, *383*, 2291–2293, doi:10.1056/NEJMc2031364.

27. Greaney, A.J.; Starr, T.N.; Barnes, C.O.; Weisblum, Y.; Schmidt, F.; Caskey, M.; Gaebler, C.; Cho, A.; Agudelo, M.; Finkin, S.; et al. Mutational Escape from the Polyclonal Antibody Response to SARS-CoV-2 Infection Is Largely Shaped by a Single Class of Antibodies. *bioRxiv* **2021**, 2021.03.17.435863, doi:10.1101/2021.03.17.435863.
28. Starr, T.N.; Greaney, A.J.; Dingens, A.S.; Bloom, J.D. Complete Map of SARS-CoV-2 RBD Mutations That Escape the Monoclonal Antibody LY-CoV555 and Its Cocktail with LY-CoV016. *bioRxiv* **2021**, 2021.02.17.431683, doi:10.1101/2021.02.17.431683.
29. Starr, T.N.; Greaney, A.J.; Hilton, S.K.; Ellis, D.; Crawford, K.H.D.; Dingens, A.S.; Navarro, M.J.; Bowen, J.E.; Tortorici, M.A.; Walls, A.C.; et al. Deep Mutational Scanning of SARS-CoV-2 Receptor Binding Domain Reveals Constraints on Folding and ACE2 Binding. *Cell* **2020**, *182*, 1295-1310.e20, doi:10.1016/j.cell.2020.08.012.
30. Madhi, S.A.; Baillie, V.; Cutland, C.L.; Voysey, M.; Koen, A.L.; Fairlie, L.; Padayachee, S.D.; Dheda, K.; Barnabas, S.L.; Borhat, Q.E.; et al. Efficacy of the ChAdOx1 NCoV-19 Covid-19 Vaccine against the B.1.351 Variant. *N. Engl. J. Med.* **2021**, *0*, null, doi:10.1056/NEJMoa2102214.
31. Shen, X.; Tang, H.; Pajon, R.; Smith, G.; Glenn, G.M.; Shi, W.; Korber, B.; Montefiori, D.C. Neutralization of SARS-CoV-2 Variants B.1.429 and B.1.351. *N. Engl. J. Med.* **2021**, *0*, null, doi:10.1056/NEJMc2103740.
32. Zhang, W.; Davis, B.D.; Chen, S.S.; Martinez, J.M.S.; Plummer, J.T.; Vail, E. Emergence of a Novel SARS-CoV-2 Strain in Southern California, USA. *medRxiv* **2021**, 2021.01.18.21249786, doi:10.1101/2021.01.18.21249786.
33. Starr, T.N.; Greaney, A.J.; Dingens, A.S.; Bloom, J.D. Complete Map of SARS-CoV-2 RBD Mutations That Escape the Monoclonal Antibody LY-CoV555 and Its Cocktail with LY-CoV016. *Cell Rep. Med.* **2021**, *2*, doi:10.1016/j.xcrm.2021.100255.
34. McCallum, M.; Bassi, J.; Marco, A.D.; Chen, A.; Walls, A.C.; Iulio, J.D.; Tortorici, M.A.; Navarro, M.-J.; Silacci-Fregni, C.; Saliba, C.; et al. SARS-CoV-2 Immune Evasion by Variant B.1.427/B.1.429. *bioRxiv* **2021**, 2021.03.31.437925, doi:10.1101/2021.03.31.437925.
35. Tegally, H.; Wilkinson, E.; Giovanetti, M.; Iranzadeh, A.; Fonseca, V.; Giandhari, J.; Doolabh, D.; Pillay, S.; San, E.J.; Msomi, N.; et al. Emergence and Rapid Spread of a New Severe Acute Respiratory Syndrome-Related Coronavirus 2 (SARS-CoV-2) Lineage with Multiple Spike Mutations in South Africa. *medRxiv* **2020**, 2020.12.21.20248640, doi:10.1101/2020.12.21.20248640.
36. Brejova, B.; Hodorová, V.; Boršová, K.; Čabanová, V.; Reizigová, L.; Paul, E.D.; Čekan, P.; Klempa, B.; Nosek, J.; Vinař, T. B.1.258Δ, a SARS-CoV-2 Variant with ΔH69/ΔV70 in the Spike Protein Circulating in the Czech Republic and Slovakia - SARS-CoV-2 Coronavirus / NCoV-2019 Genomic Epidemiology Available online: <https://virological.org/t/b-1-258-a-sars-cov-2-variant-with-h69-v70-in-the-spike-protein-circulating-in-the-czech-republic-and-slovakia/613> (accessed on 5 April 2021).
37. Ozer, E.A.; Simons, L.M.; Adewumi, O.M.; Fowotade, A.A.; Omoruyi, E.C.; Adeniji, J.A.; Dean, T.J.; Taiwo, B.O.; Hultquist, J.F.; Lorenzo-Redondo, R. High Prevalence of SARS-CoV-2 B.1.1.7 (UK Variant) and the Novel B.1.525 Lineage in Oyo State, Nigeria. *medRxiv* **2021**, 2021.04.09.21255206, doi:10.1101/2021.04.09.21255206.
38. Lasek-Nesselquist, E.; Lapierre, P.; Schneider, E.; George, K.S.; Pata, J. The Localized Rise of a B.1.526 SARS-CoV-2 Variant Containing an E484K Mutation in New York State. *medRxiv* **2021**, 2021.02.26.21251868, doi:10.1101/2021.02.26.21251868.
39. McCarthy, K.R.; Rennick, L.J.; Nambulli, S.; Robinson-McCarthy, L.R.; Bain, W.G.; Haidar, G.; Duprex, W.P. Recurrent Deletions in the SARS-CoV-2 Spike Glycoprotein Drive Antibody Escape. *Science* **2021**, *371*, 1139–1142, doi:10.1126/science.abf6950.
40. Johnson, B.A.; Xie, X.; Bailey, A.L.; Kalveram, B.; Lokugamage, K.G.; Muruato, A.; Zou, J.; Zhang, X.; Juelich, T.; Smith, J.K.; et al. Loss of Furin Cleavage Site Attenuates SARS-CoV-2 Pathogenesis. *Nature* **2021**, *591*, 293–299, doi:10.1038/s41586-021-03237-4.
41. Ge, X.-Y.; Wang, N.; Zhang, W.; Hu, B.; Li, B.; Zhang, Y.-Z.; Zhou, J.-H.; Luo, C.-M.; Yang, X.-L.; Wu, L.-J.; et al. Coexistence of Multiple Coronaviruses in Several Bat Colonies in an Abandoned Mineshaft. *Virolog. Sin.* **2016**, *31*, 31–40, doi:10.1007/s12250-016-3713-9.
42. Zhou, H.; Chen, X.; Hu, T.; Li, J.; Song, H.; Liu, Y.; Wang, P.; Liu, D.; Yang, J.; Holmes, E.C.; et al. A Novel Bat Coronavirus Closely Related to SARS-CoV-2 Contains Natural Insertions at the S1/S2 Cleavage Site of the Spike Protein. *Curr. Biol.* **2020**, *30*, 2196-2203.e3, doi:10.1016/j.cub.2020.05.023.

43. Katoh, K.; Misawa, K.; Kuma, K.; Miyata, T. MAFFT: A Novel Method for Rapid Multiple Sequence Alignment Based on Fast Fourier Transform. *Nucleic Acids Res.* **2002**, *30*, 3059–3066, doi:10.1093/nar/gkf436.
44. Price, M.N.; Dehal, P.S.; Arkin, A.P. FastTree 2 – Approximately Maximum-Likelihood Trees for Large Alignments. *PLOS ONE* **2010**, *5*, e9490, doi:10.1371/journal.pone.0009490.
45. Sagulenko, P.; Puller, V.; Neher, R.A. TreeTime: Maximum-Likelihood Phylodynamic Analysis. *Virus Evol.* **2018**, *4*, doi:10.1093/ve/vex042.
46. Kumar, S.; Stecher, G.; Li, M.; Knyaz, C.; Tamura, K. MEGA X: Molecular Evolutionary Genetics Analysis across Computing Platforms. *Mol. Biol. Evol.* **2018**, *35*, 1547–1549, doi:10.1093/molbev/msy096.
47. Kistler, K.E.; Bedford, T. Evidence for Adaptive Evolution in the Receptor-Binding Domain of Seasonal Coronaviruses OC43 and 229e. *eLife* **2021**, *10*, e64509, doi:10.7554/eLife.64509.
48. Resende, P.C.; Naveca, F.G.; Lins, R.D.; Dezordi, F.Z.; Ferraz, M.V.F.; Moreira, E.G.; Coêlho, D.F.; Motta, F.C.; Paixão, A.C.D.; Appolinario, L.; et al. The Ongoing Evolution of Variants of Concern and Interest of SARS-CoV-2 in Brazil Revealed by Convergent Indels in the Amino (N)-Terminal Domain of the Spike Protein. *medRxiv* **2021**, 2021.03.19.21253946, doi:10.1101/2021.03.19.21253946.
49. Faria, N.R.; Mellan, T.A.; Whittaker, C.; Claro, I.M.; Candido, D. da S.; Mishra, S.; Crispim, M.A.E.; Sales, F.C.S.; Hawryluk, I.; McCrone, J.T.; et al. Genomics and Epidemiology of the P.1 SARS-CoV-2 Lineage in Manaus, Brazil. *Science* **2021**, doi:10.1126/science.abh2644.
50. Volz, E.; Mishra, S.; Chand, M.; Barrett, J.C.; Johnson, R.; Geidelberg, L.; Hinsley, W.R.; Laydon, D.J.; Dabrera, G.; O’Toole, Á.; et al. Assessing Transmissibility of SARS-CoV-2 Lineage B.1.1.7 in England. *Nature* **2021**, 1–17, doi:10.1038/s41586-021-03470-x.
51. Tchesnokova, V.; Kulakesara, H.; Larson, L.; Bowers, V.; Rechkina, E.; Kisiela, D.; Sledneva, Y.; Choudhury, D.; Maslova, I.; Deng, K.; et al. Acquisition of the L452R Mutation in the ACE2-Binding Interface of Spike Protein Triggers Recent Massive Expansion of SARS-Cov-2 Variants. *bioRxiv* **2021**, 2021.02.22.432189, doi:10.1101/2021.02.22.432189.
52. Cherian, S.; Potdar, V.; Jadhav, S.; Yadav, P.; Gupta, N.; Das, M.; Das, S.; Agarwal, A.; Singh, S.; Abraham, P.; et al. Convergent Evolution of SARS-CoV-2 Spike Mutations, L452R, E484Q and P681R, in the Second Wave of COVID-19 in Maharashtra, India. *bioRxiv* **2021**, 2021.04.22.440932, doi:10.1101/2021.04.22.440932.
53. Teng, S.; Sobitan, A.; Rhoades, R.; Liu, D.; Tang, Q. Systemic Effects of Missense Mutations on SARS-CoV-2 Spike Glycoprotein Stability and Receptor-Binding Affinity. *Brief. Bioinform.* **2021**, *22*, 1239–1253, doi:10.1093/bib/bbaa233.
54. Yin, R.; Guest, J.D.; Taherzadeh, G.; Gowthaman, R.; Mittra, I.; Quackenbush, J.; Pierce, B.G. Structural and Energetic Profiling of SARS-CoV-2 Antibody Recognition and the Impact of Circulating Variants. *bioRxiv* **2021**, 2021.03.21.436311, doi:10.1101/2021.03.21.436311.
55. Liu, Z.; VanBlargan, L.A.; Bloyet, L.-M.; Rothlauf, P.W.; Chen, R.E.; Stumpf, S.; Zhao, H.; Errico, J.M.; Theel, E.S.; Liebeskind, M.J.; et al. Landscape Analysis of Escape Variants Identifies SARS-CoV-2 Spike Mutations That Attenuate Monoclonal and Serum Antibody Neutralization. *bioRxiv* **2021**, 2020.11.06.372037, doi:10.1101/2020.11.06.372037.
56. Alouane, T.; Laamarti, M.; Essabbar, A.; Hakmi, M.; Bouricha, E.M.; Chemao-Elfihri, M.W.; Kartti, S.; Boumajdi, N.; Bendani, H.; Laamarti, R.; et al. Genomic Diversity and Hotspot Mutations in 30,983 SARS-CoV-2 Genomes: Moving Toward a Universal Vaccine for the “Confined Virus”? *Pathog. Basel Switz.* **2020**, *9*, doi:10.3390/pathogens9100829.
57. Franco, D.; Gonzalez, C.; Abrego, L.E.; Carrera, J.-P.; Diaz, Y.; Caicedo, Y.; Moreno, A.; Chavarria, O.; Gondola, J.; Castillo, M.; et al. Early Transmission Dynamics, Spread, and Genomic Characterization of SARS-CoV-2 in Panama. *Emerg. Infect. Dis.* **2020**, *27*, 612–615, doi:10.3201/eid2702.203767.
58. Vavrek, D.; Speroni, L.; Curnow, K.J.; Oberholzer, M.; Moeder, V.; Febbo, P.G. Genomic Surveillance at Scale Is Required to Detect Newly Emerging Strains at an Early Timepoint. *medRxiv* **2021**, 2021.01.12.21249613, doi:10.1101/2021.01.12.21249613.
59. Molina-Mora, J.A.; Cordero-Laurent, E.; Godínez, A.; Calderón, M.; Brenes, H.; Soto-Garita, C.; Pérez-Corrales, C.; Rica, C.-C.C.I. de E.G. del S.-C.-2 C.; Drexler, J.F.; Moreira-Soto, A.; et al. SARS-CoV-2 Genomic Surveillance in Costa Rica: Evidence of a Divergent Population and an Increased Detection of a Spike T1117I Mutation. *bioRxiv* **2020**, 2020.12.21.423850, doi:10.1101/2020.12.21.423850.

60. Ntoumi, F.; Mfoutou Mapanguy, C.C.; Tomazatos, A.; Pallerla, S.R.; Linh, L.T.K.; Casadei, N.; Angelov, A.; Sonnabend, M.; Peter, S.; Kremsner, P.G.; et al. Genomic Surveillance of SARS-CoV-2 in the Republic of Congo. *Int. J. Infect. Dis.* **2021**, *105*, 735–738, doi:10.1016/j.ijid.2021.03.036.
61. Variant Technical Group SARS-CoV-2 Variants of Concern and Variants under Investigation in England - Technical Briefing 9 2021.
62. Cerutti, G.; Guo, Y.; Zhou, T.; Gorman, J.; Lee, M.; Rapp, M.; Reddem, E.R.; Yu, J.; Bahna, F.; Bimela, J.; et al. Potent SARS-CoV-2 Neutralizing Antibodies Directed against Spike N-Terminal Domain Target a Single Supersite. *Cell Host Microbe* **2021**, doi:10.1016/j.chom.2021.03.005.
63. McCallum, M.; Marco, A.D.; Lempp, F.; Tortorici, M.A.; Pinto, D.; Walls, A.C.; Beltramello, M.; Chen, A.; Liu, Z.; Zatta, F.; et al. N-Terminal Domain Antigenic Mapping Reveals a Site of Vulnerability for SARS-CoV-2. *bioRxiv* **2021**, 2021.01.14.426475, doi:10.1101/2021.01.14.426475.
64. Garry, R.F.; Andersen, K.G.; Gallaher, W.R.; Tsan-Yuk Lam, T.; Gangaparapu, K.; Latif, A.A.; Beddingfield, B.J.; Rambaut, A.; Holmes, E.C. Spike Protein Mutations in Novel SARS-CoV-2 ‘Variants of Concern’ Commonly Occur in or near Indels Available online: <https://virological.org/t/spike-protein-mutations-in-novel-sars-cov-2-variants-of-concern-commonly-occur-in-or-near-indels/605> (accessed on 5 May 2021).
65. Kemp, S.A.; Meng, B.; Ferreira, I.A.; Datir, R.; Harvey, W.T.; Papa, G.; Lytras, S.; Collier, D.A.; Mohamed, A.; Gallo, G.; et al. Recurrent Emergence and Transmission of a SARS-CoV-2 Spike Deletion H69/V70. *bioRxiv* **2021**, 2020.12.14.422555, doi:10.1101/2020.12.14.422555.
66. Kubik, S.; Marques, A.C.; Xing, X.; Silvery, J.; Bertelli, C.; Maio, F.D.; Pournaras, S.; Burr, T.; Duffourd, Y.; Siemens, H.; et al. Guidelines for Accurate Genotyping of SARS-CoV-2 Using Amplicon-Based Sequencing of Clinical Samples. *bioRxiv* **2020**, 2020.12.01.405738, doi:10.1101/2020.12.01.405738.
67. Bull, R.A.; Adikari, T.N.; Ferguson, J.M.; Hammond, J.M.; Stevanovski, I.; Beukers, A.G.; Naing, Z.; Yeang, M.; Verich, A.; Gamaarachchi, H.; et al. Analytical Validity of Nanopore Sequencing for Rapid SARS-CoV-2 Genome Analysis. *Nat. Commun.* **2020**, *11*, 6272, doi:10.1038/s41467-020-20075-6.
68. Posada-Céspedes, S.; Seifert, D.; Topolsky, I.; Jablonski, K.P.; Metzner, K.J.; Beerwinkler, N. V-Pipe: A Computational Pipeline for Assessing Viral Genetic Diversity from High-Throughput Data. *Bioinformatics* **2021**, doi:10.1093/bioinformatics/btab015.
